# Supplementary material for: Inactivation of Src-to-Ezrin Pathway: A Possible Mechanism in the Ouabain-Mediated Inhibition of A549 Cell Migration
Source: Hindawi journal article supplement (doi:10.1155/2015/537136), 2015-01-01
Supplement: f1 [file 537136.f1.pdf]

Figure 1

A

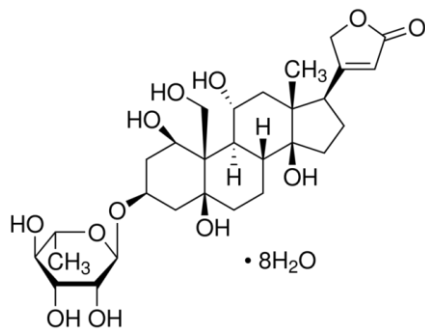

B

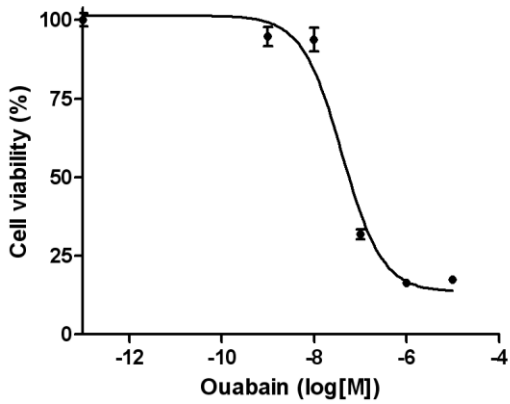

Figure 2

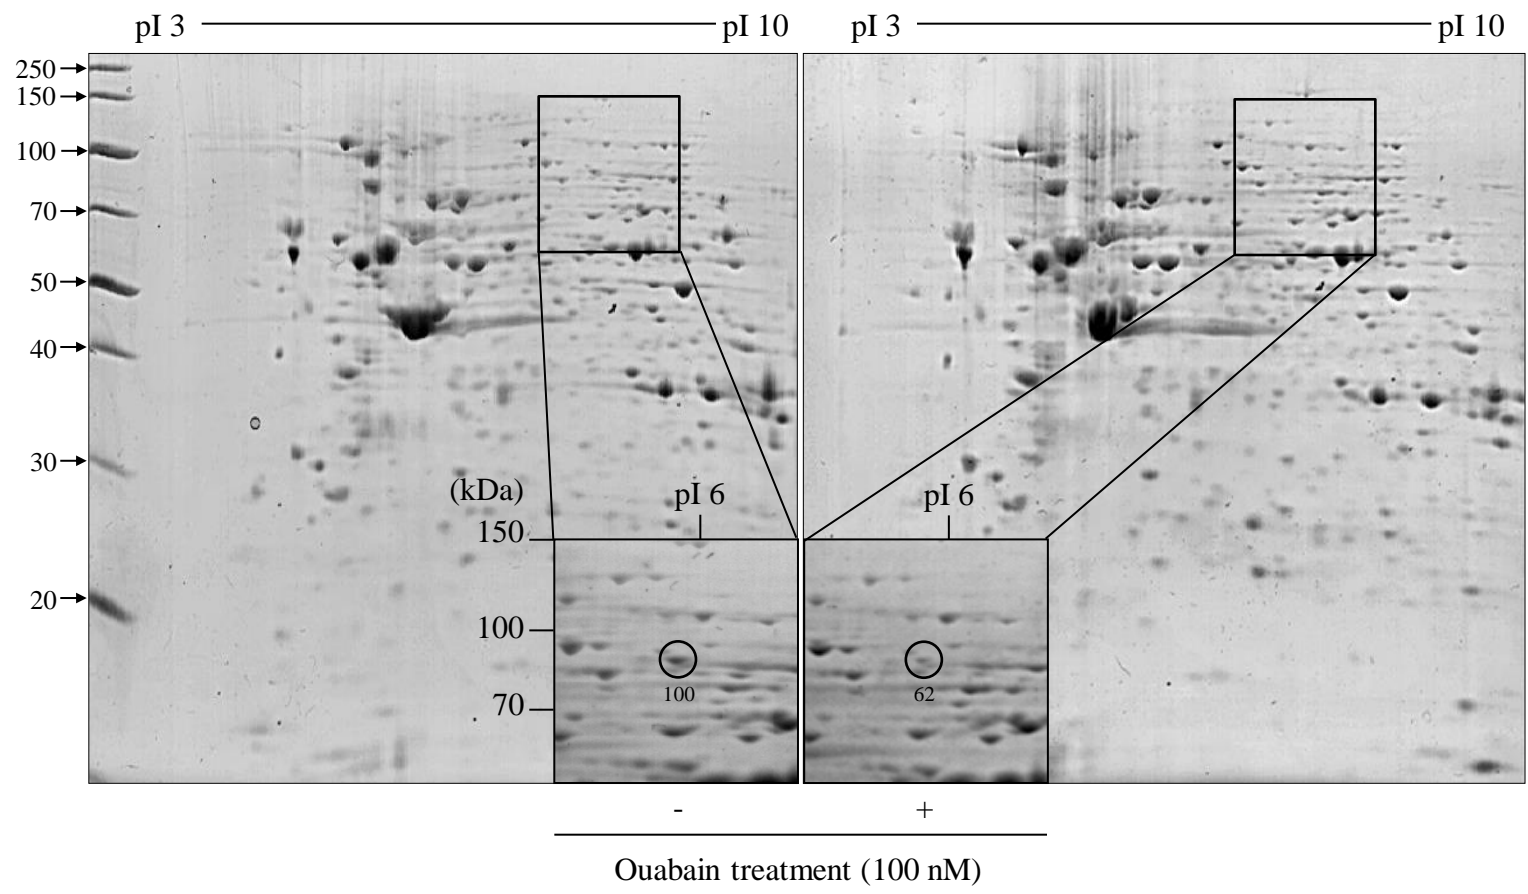

Figure 3

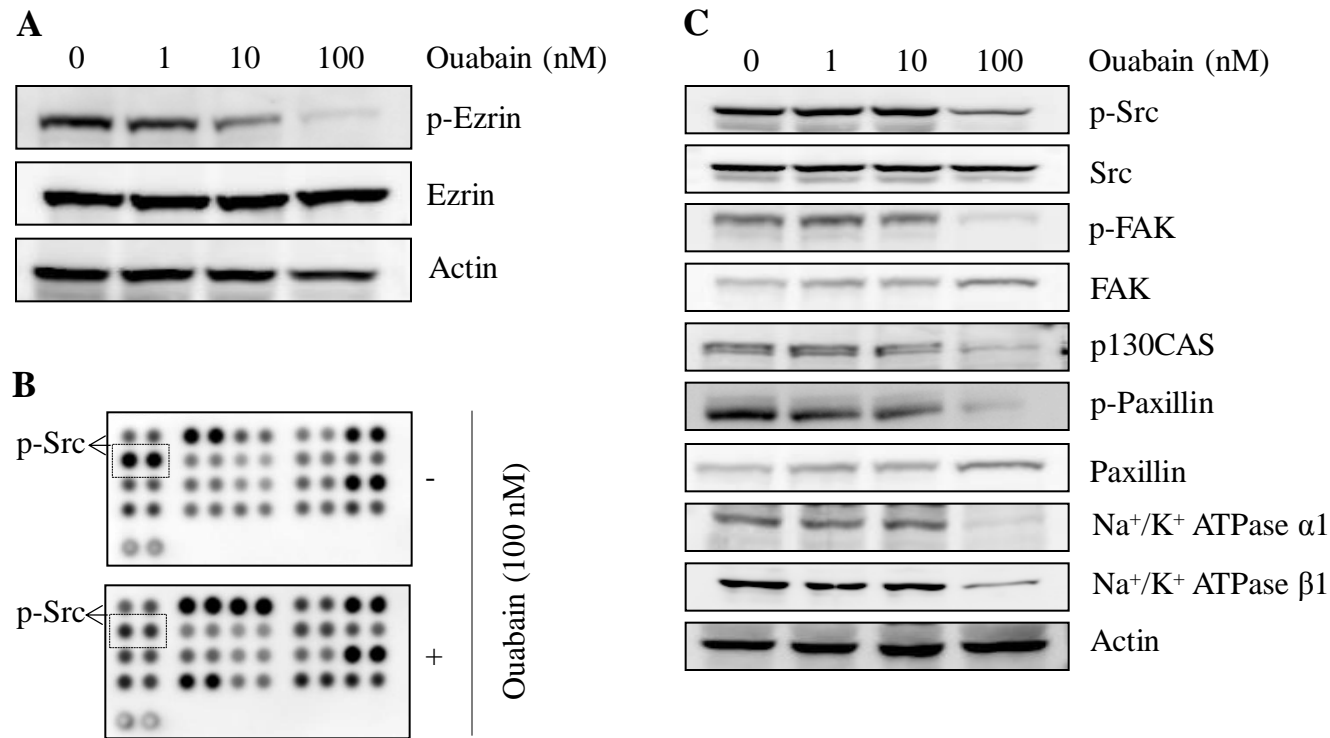

Figure 4

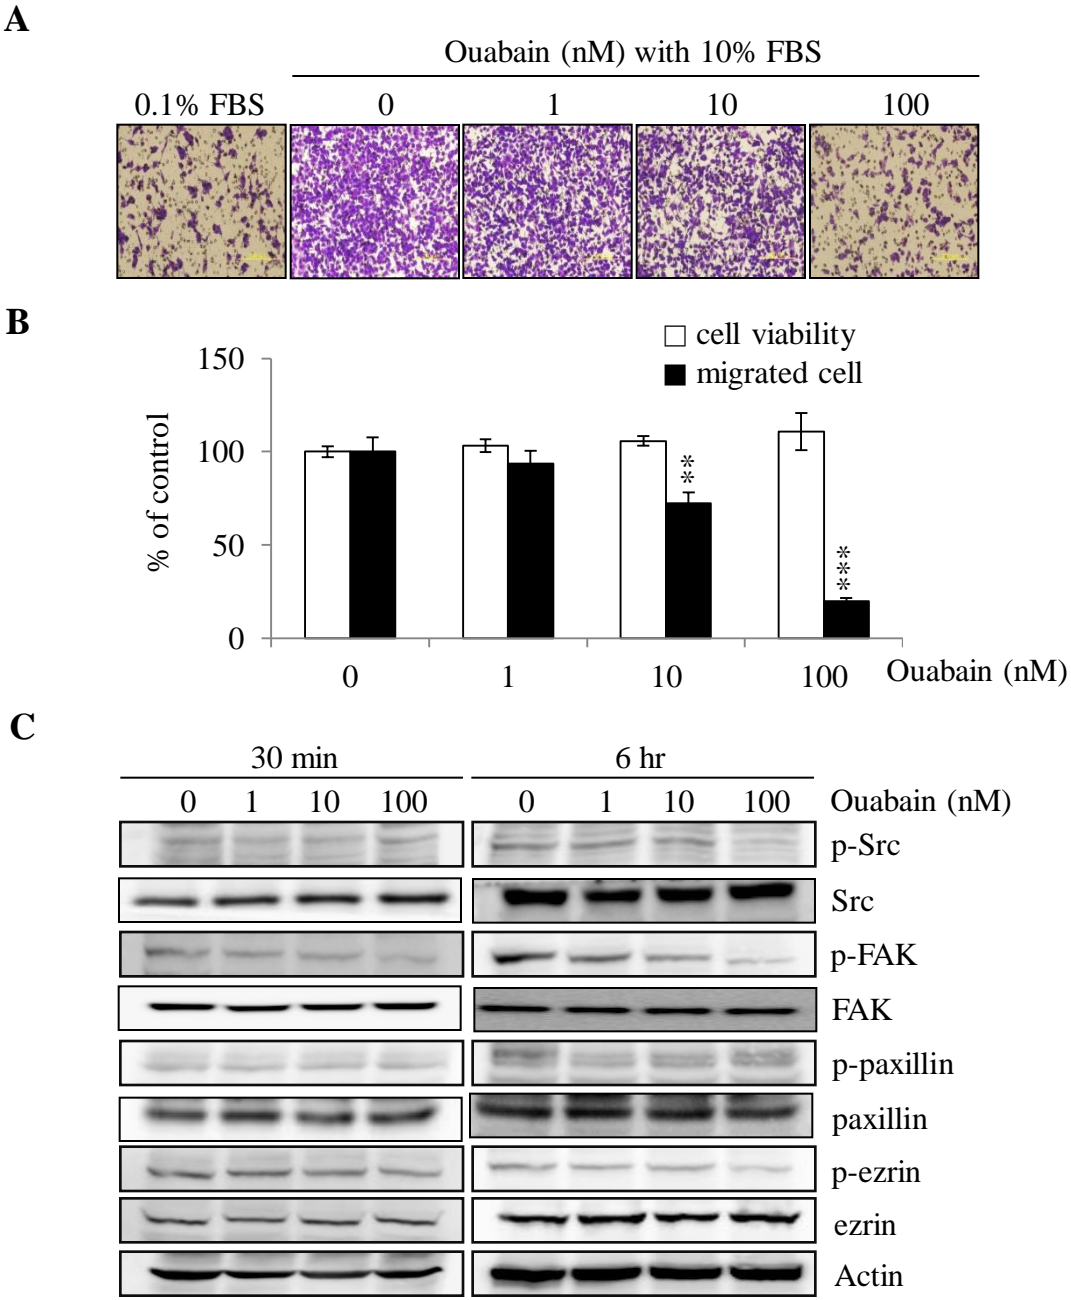

Figure 5

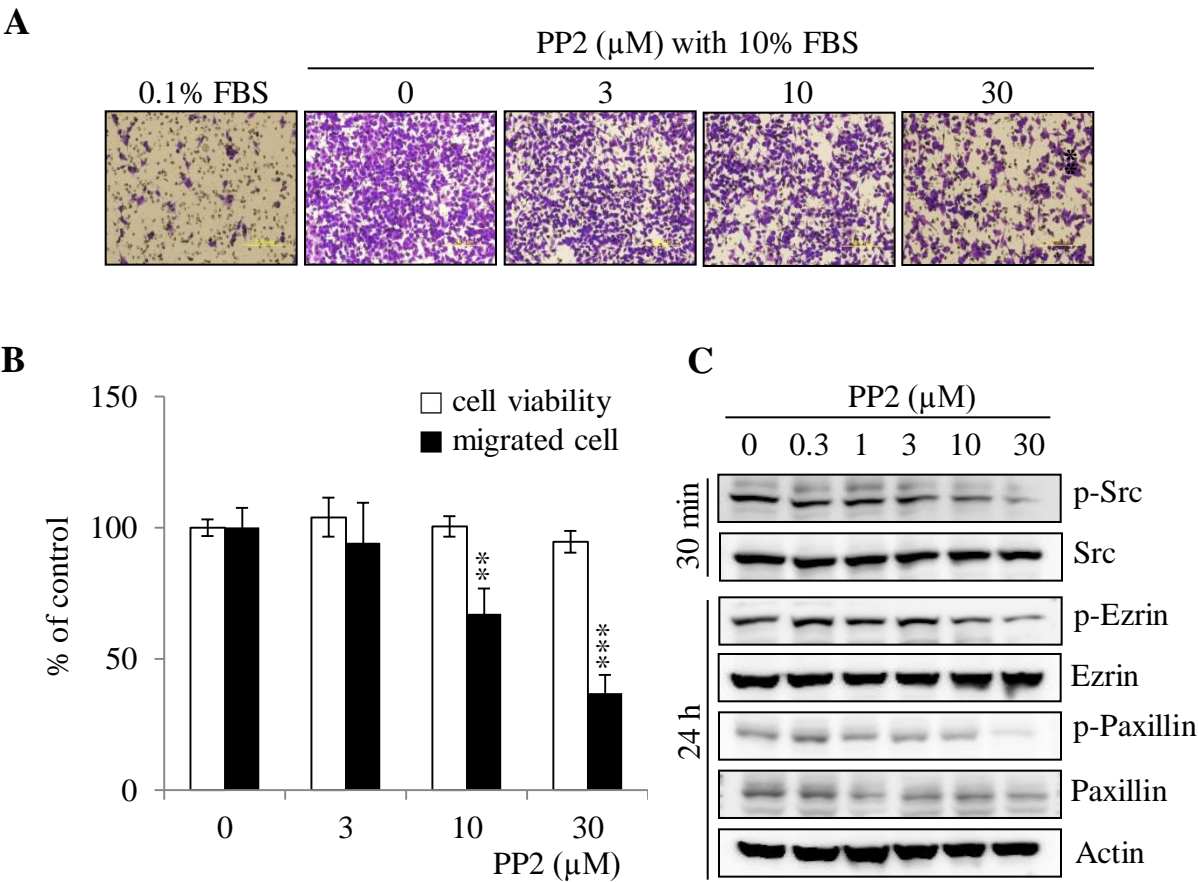

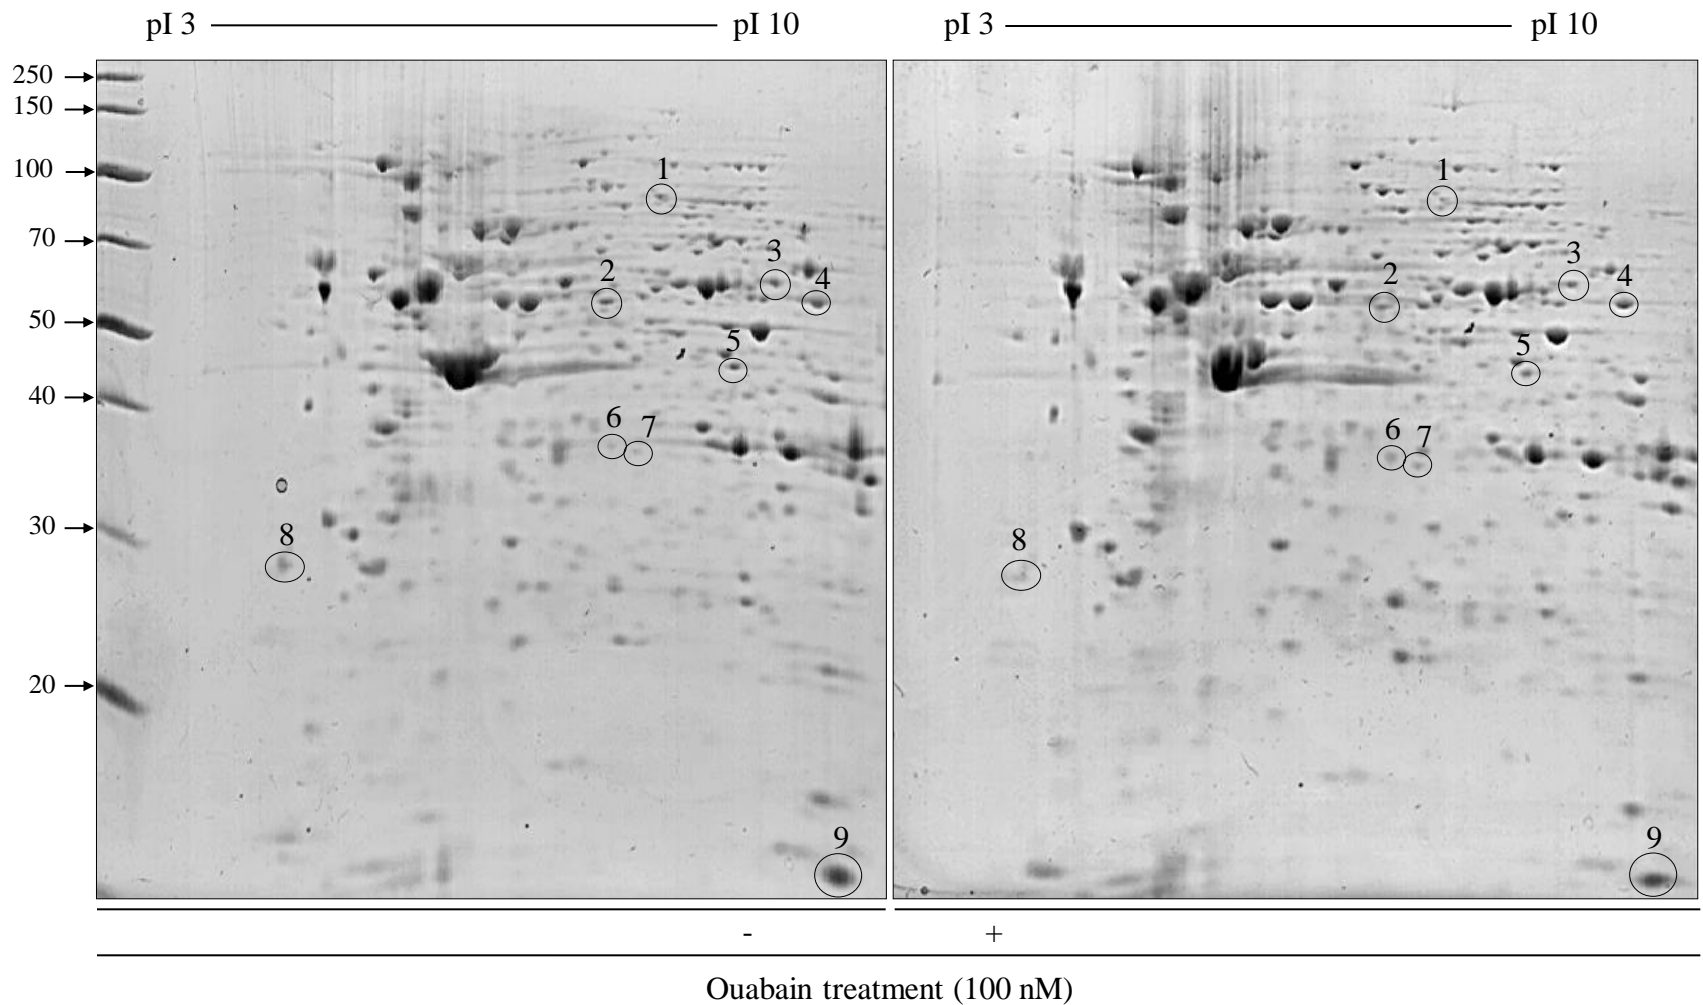

**Figure S1.** Differentially expressed proteins by ouabain treatment in A549 cells. Circled spots represented the differentially expressed proteins that were further identified by MALDI-TOF MS.
