# Supplementary material for: Inactivation of Src-to-Ezrin Pathway: A Possible Mechanism in the Ouabain-Mediated Inhibition of A549 Cell Migration
Source: Hindawi journal article supplement (doi:10.1155/2015/537136), 2015-01-01
Supplement: f2 [file 537136.f2.pdf]

Table S1. MALDI-TOF-based identification

| No. | Protein name                                                                                                        | NCBI BLAST   | No.of<br>matched peptides | Sequence<br>coverage (%) | Theoretical<br>Mr(Da)/pI | Score | Expect   | Expression<br>by ouabain |
|-----|---------------------------------------------------------------------------------------------------------------------|--------------|---------------------------|--------------------------|--------------------------|-------|----------|--------------------------|
| 1   | Ezrin                                                                                                               | gi 46249758  | 21                        | 30                       | 69.2/5.94                | 116   | 6.1e-07  | Decreased                |
| 2   | Chain A, Crystal Structure Of The Aminoacylation Cataytic Fragment Of Human Tryptophanyl-Trna Synthetase            | gi 50513261  | 14                        | 43                       | 43.3/7.12                | 146   | 6.1e-10  | Decreased                |
| 3   | HNRNPL protein                                                                                                      | gi 211828181 | 17                        | 21                       | 61.8/7.07                | 81    | 0.0018   | Decreased                |
| 4   | Chain A, Structure Of Human Muscle Pyruvate Kinase (Pkm2)                                                           | gi 67464392  | 17                        | 40                       | 59.7/8.22                | 191   | 1.9e-14  | Decreased                |
| 5   | CXorf22 protein                                                                                                     | gi 20380780  | 30                        | 24                       | 85.4/8.85                | 64    | 0.037    | Decreased                |
| 6   | Ribosomal protein, large, P0                                                                                        | gi 12654583  | 17                        | 53                       | 34.2/5.42                | 123   | 1.2e-07  | Increased                |
| 7   | 26S proteasome non-ATPase regulatory subunit 14                                                                     | gi 5031981   | 20                        | 47                       | 34.5/6.06                | 84    | 0.001    | Increased                |
| 8   | Chain A, Human 3alpha-Hsd Type 3 In Ternary Complex With Nadp And Testosterone                                      | gi 21465695  | 12                        | 48                       | 36.6/6.86                | 131   | 1.9e-08  | Decreased                |
| 9   | Chain A, X-ray Structure Of Nm23 Human Nucleoside Diphosphate Kinase B Complexed With Gdp At 2 Angstroms Resolution | gi 1421609   | 30                        | 59                       | 17.1/8.55                | 96    | 5.40e-05 | Decreased                |
